# Supplementary material for: Fusion data from FT-IR and MALDI-TOF MS result in more accurate classification of specific microbiota
Source: Royal Society of Chemistry journal article supplement (doi:10.1039/d3an01108a), 2023-01-01
Supplement: d3an01108a1.pdf [file d3an01108a1.pdf]

## Supporting Information

### **Fusion data from FT-IR and MALDI-TOF MS result in more accurate classification of specific microbiota**

Wenjing Gao,<sup>‡a</sup> Ying Han,<sup>‡b</sup> Liangqiang Chen,<sup>b</sup> Xue Tan,<sup>b</sup> Jieyou Liu,<sup>c</sup> Jinghang Xie,<sup>a</sup> Bin Li,<sup>a</sup>  
Huilin Zhao,<sup>a</sup> Shaoning Yu,<sup>a</sup> Huabin Tu,<sup>b</sup> Bin Feng<sup>\*a</sup> and Fan Yang<sup>\*b</sup>

<sup>a</sup> Institute of Mass Spectrometry, School of Material Science and Chemical Engineering, Ningbo University, Ningbo, Zhejiang 315211, China

<sup>b</sup> Kweichow Moutai Group, Renhuai, Guizhou 564501, China

<sup>c</sup> Zhuhai DL Biotech Co., Ltd, Zhuhai, Guangdong 519041, China.

<sup>‡</sup>, Wenjing Gao and Ying Han contributed equally.

\*Corresponding address:

Bin Feng, Institute of Mass Spectrometry, School of Material Science and Chemical Engineering, Ningbo University, Ningbo, Zhejiang 315211, China. Electronic address: fengbin@nbu.edu.cn.

Fan Yang, Kweichow Moutai Group, Renhuai, Guizhou 564501, China. Electronic address: yangfanmt@189.cn.

**Table S1.** Concentration and MALDI-TOF identification of single bacteria

| Short name | Concentration ( $\times 10^8$ CFU/mL) | Identification result |                   |       |
|------------|---------------------------------------|-----------------------|-------------------|-------|
|            |                                       | Genus                 | Species           | Score |
| <i>E.c</i> | 9.1                                   | <i>Escherichia</i>    | <i>coli</i>       | 2.11  |
|            |                                       | <i>Escherichia</i>    | <i>coli</i>       | 2.13  |
|            |                                       | <i>Escherichia</i>    | <i>coli</i>       | 2.17  |
| <i>B.c</i> | 4.2                                   | <i>Bacillus</i>       | <i>cereus</i>     | 2.15  |
|            |                                       | <i>Bacillus</i>       | <i>cereus</i>     | 2.29  |
|            |                                       | <i>Bacillus</i>       | <i>cereus</i>     | 2.46  |
| <i>S.a</i> | 5.3                                   | <i>Staphylococcus</i> | <i>aureus</i>     | 2.03  |
|            |                                       | <i>Staphylococcus</i> | <i>aureus</i>     | 2.03  |
|            |                                       | <i>Staphylococcus</i> | <i>aureus</i>     | 2.11  |
| <i>C.y</i> | 8.1                                   | <i>Citrobacter</i>    | <i>youngae</i>    | 2.32  |
|            |                                       | <i>Citrobacter</i>    | <i>youngae</i>    | 2.26  |
|            |                                       | <i>Citrobacter</i>    | <i>youngae</i>    | 2.05  |
| <i>P.a</i> | 7.5                                   | <i>Pseudomonas</i>    | <i>aeruginosa</i> | 2.39  |
|            |                                       | <i>Pseudomonas</i>    | <i>aeruginosa</i> | 2.33  |
|            |                                       | <i>Pseudomonas</i>    | <i>aeruginosa</i> | 2.34  |
| <i>K.a</i> | 7.6                                   | <i>Klebsiella</i>     | <i>aerogenes</i>  | 2.39  |
|            |                                       | <i>Klebsiella</i>     | <i>aerogenes</i>  | 2.02  |
|            |                                       | <i>Klebsiella</i>     | <i>aerogenes</i>  | 2.23  |
| <i>C.f</i> | 8.3                                   | <i>Citrobacter</i>    | <i>freundii</i>   | 2.32  |
|            |                                       | <i>Citrobacter</i>    | <i>freundii</i>   | 2.32  |
|            |                                       | <i>Citrobacter</i>    | <i>freundii</i>   | 2.37  |
| <i>A.b</i> | 8.1                                   | <i>Acinetobacter</i>  | <i>baumannii</i>  | 2.22  |
|            |                                       | <i>Acinetobacter</i>  | <i>baumannii</i>  | 2.34  |
|            |                                       | <i>Acinetobacter</i>  | <i>baumannii</i>  | 2.30  |
| <i>K.p</i> | 6.8                                   | <i>Klebsiella</i>     | <i>pneumoniae</i> | 2.15  |
|            |                                       | <i>Klebsiella</i>     | <i>pneumoniae</i> | 2.07  |
|            |                                       | <i>Klebsiella</i>     | <i>pneumoniae</i> | 2.35  |

**Table S2.** Proportions of 20 model microbiotas

| Microbiota<br>number | Proportion (%) |            |            |            |            |            |            |            |            |
|----------------------|----------------|------------|------------|------------|------------|------------|------------|------------|------------|
|                      | <i>E.c</i>     | <i>B.c</i> | <i>S.a</i> | <i>K.p</i> | <i>C.f</i> | <i>A.b</i> | <i>P.a</i> | <i>C.y</i> | <i>K.a</i> |
| Q1                   | 13.89          | 13.89      | 13.89      | 13.89      | 13.89      | 1.39       | 1.39       | 13.89      | 13.89      |
| Q2                   | 1.39           | 13.89      | 13.89      | 13.89      | 13.89      | 13.89      | 13.89      | 13.89      | 1.39       |
| Q3                   | 13.89          | 13.89      | 1.39       | 1.39       | 13.89      | 13.89      | 13.89      | 13.89      | 13.89      |
| Q4                   | 13.89          | 13.89      | 13.89      | 13.89      | 1.39       | 13.89      | 13.89      | 1.39       | 13.89      |
| Q5                   | 15.87          | 15.87      | 1.59       | 15.87      | 1.59       | 15.87      | 15.87      | 1.59       | 15.87      |
| Q6                   | 15.87          | 1.59       | 15.87      | 1.59       | 15.87      | 15.87      | 1.59       | 15.87      | 15.87      |
| Q7                   | 15.87          | 15.87      | 15.87      | 15.87      | 15.87      | 1.59       | 1.59       | 15.87      | 1.59       |
| Q8                   | 1.59           | 15.87      | 1.59       | 1.59       | 15.87      | 15.87      | 15.87      | 15.87      | 15.87      |
| Q9                   | 1.85           | 18.52      | 1.85       | 1.85       | 18.52      | 18.52      | 1.85       | 18.52      | 18.52      |
| Q10                  | 18.52          | 1.85       | 18.52      | 18.52      | 18.52      | 1.85       | 1.85       | 18.52      | 1.85       |
| Q11                  | 18.52          | 18.52      | 1.85       | 1.85       | 1.85       | 18.52      | 18.52      | 1.85       | 18.52      |
| Q12                  | 1.85           | 1.85       | 1.85       | 18.52      | 18.52      | 1.85       | 18.52      | 18.52      | 18.52      |
| Q13                  | 2.22           | 22.22      | 2.22       | 2.22       | 2.22       | 22.22      | 22.22      | 2.22       | 22.22      |
| Q14                  | 2.22           | 22.22      | 22.22      | 2.22       | 2.22       | 22.22      | 22.22      | 2.22       | 2.22       |
| Q15                  | 22.22          | 22.22      | 2.22       | 2.22       | 2.22       | 22.22      | 2.22       | 2.22       | 22.22      |
| Q16                  | 22.22          | 2.22       | 22.22      | 22.22      | 2.22       | 2.2        | 2.22       | 22.22      | 2.22       |
| Q17                  | 37.04          | 3.70       | 3.70       | 3.70       | 3.70       | 3.70       | 3.70       | 3.70       | 37.04      |
| Q18                  | 11.11          | 11.11      | 11.11      | 11.11      | 11.11      | 11.11      | 11.11      | 11.11      | 11.11      |
| Q19                  | 3.70           | 3.70       | 3.70       | 3.70       | 3.70       | 37.04      | 37.04      | 3.70       | 3.70       |
| Q20                  | 37.04          | 3.70       | 37.04      | 3.70       | 3.70       | 3.70       | 3.70       | 3.70       | 3.70       |

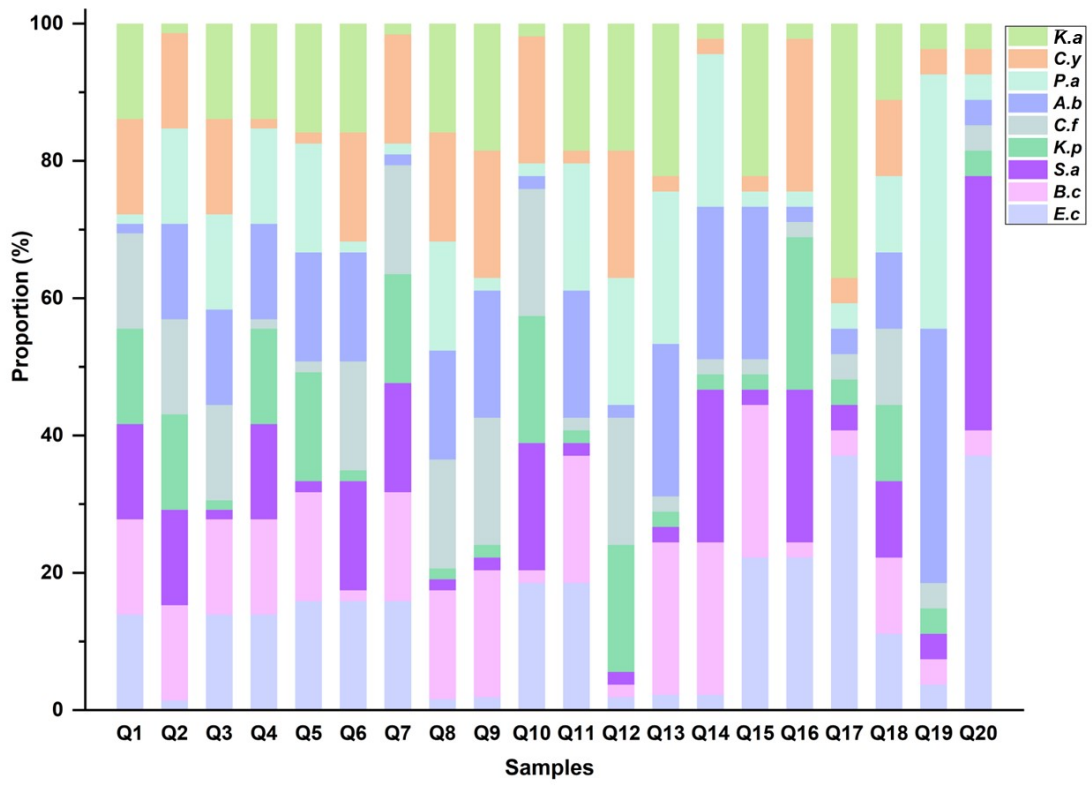

Fig. S1. Compositions of 20 model microbiotas.

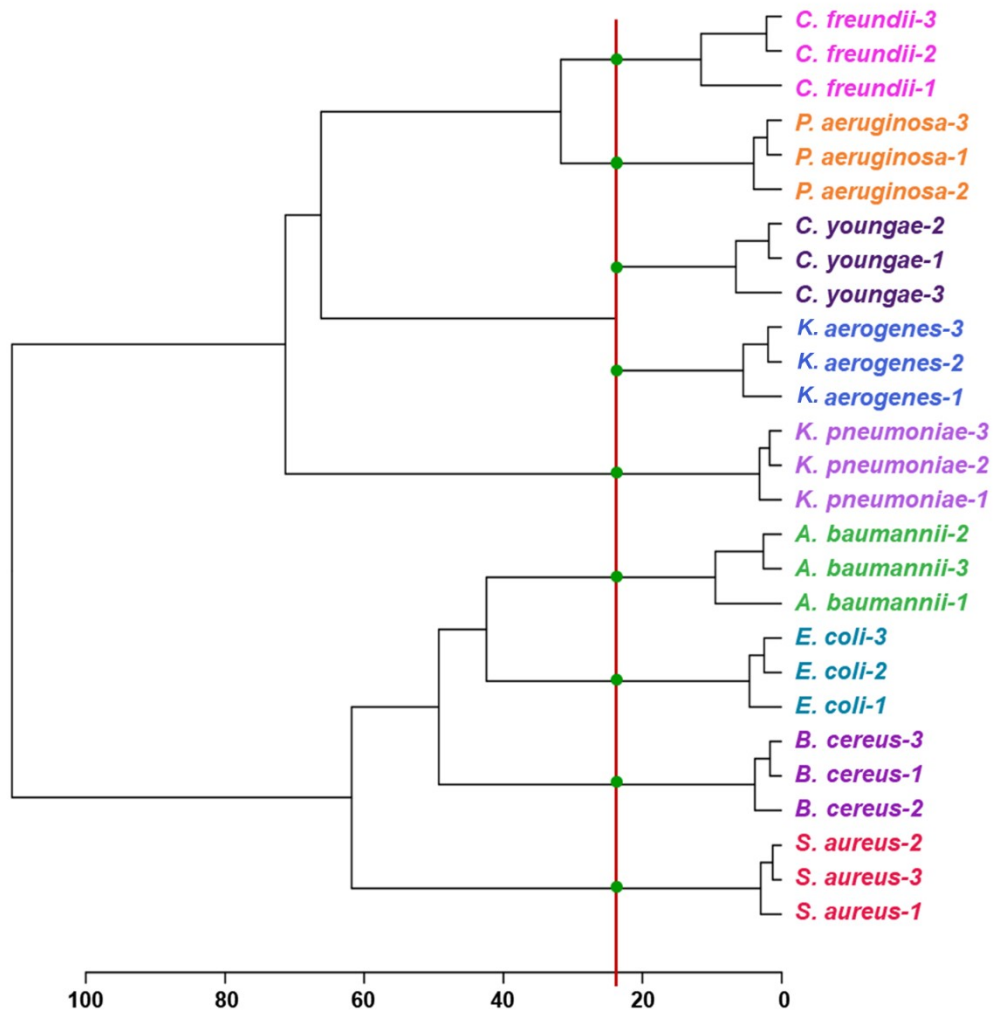

**Fig. S2.** HCA classification scheme for nine single bacteria using FT-IR. The red line represents the threshold for strain discrimination, and the green spot indicates that the strain is clustered correctly.

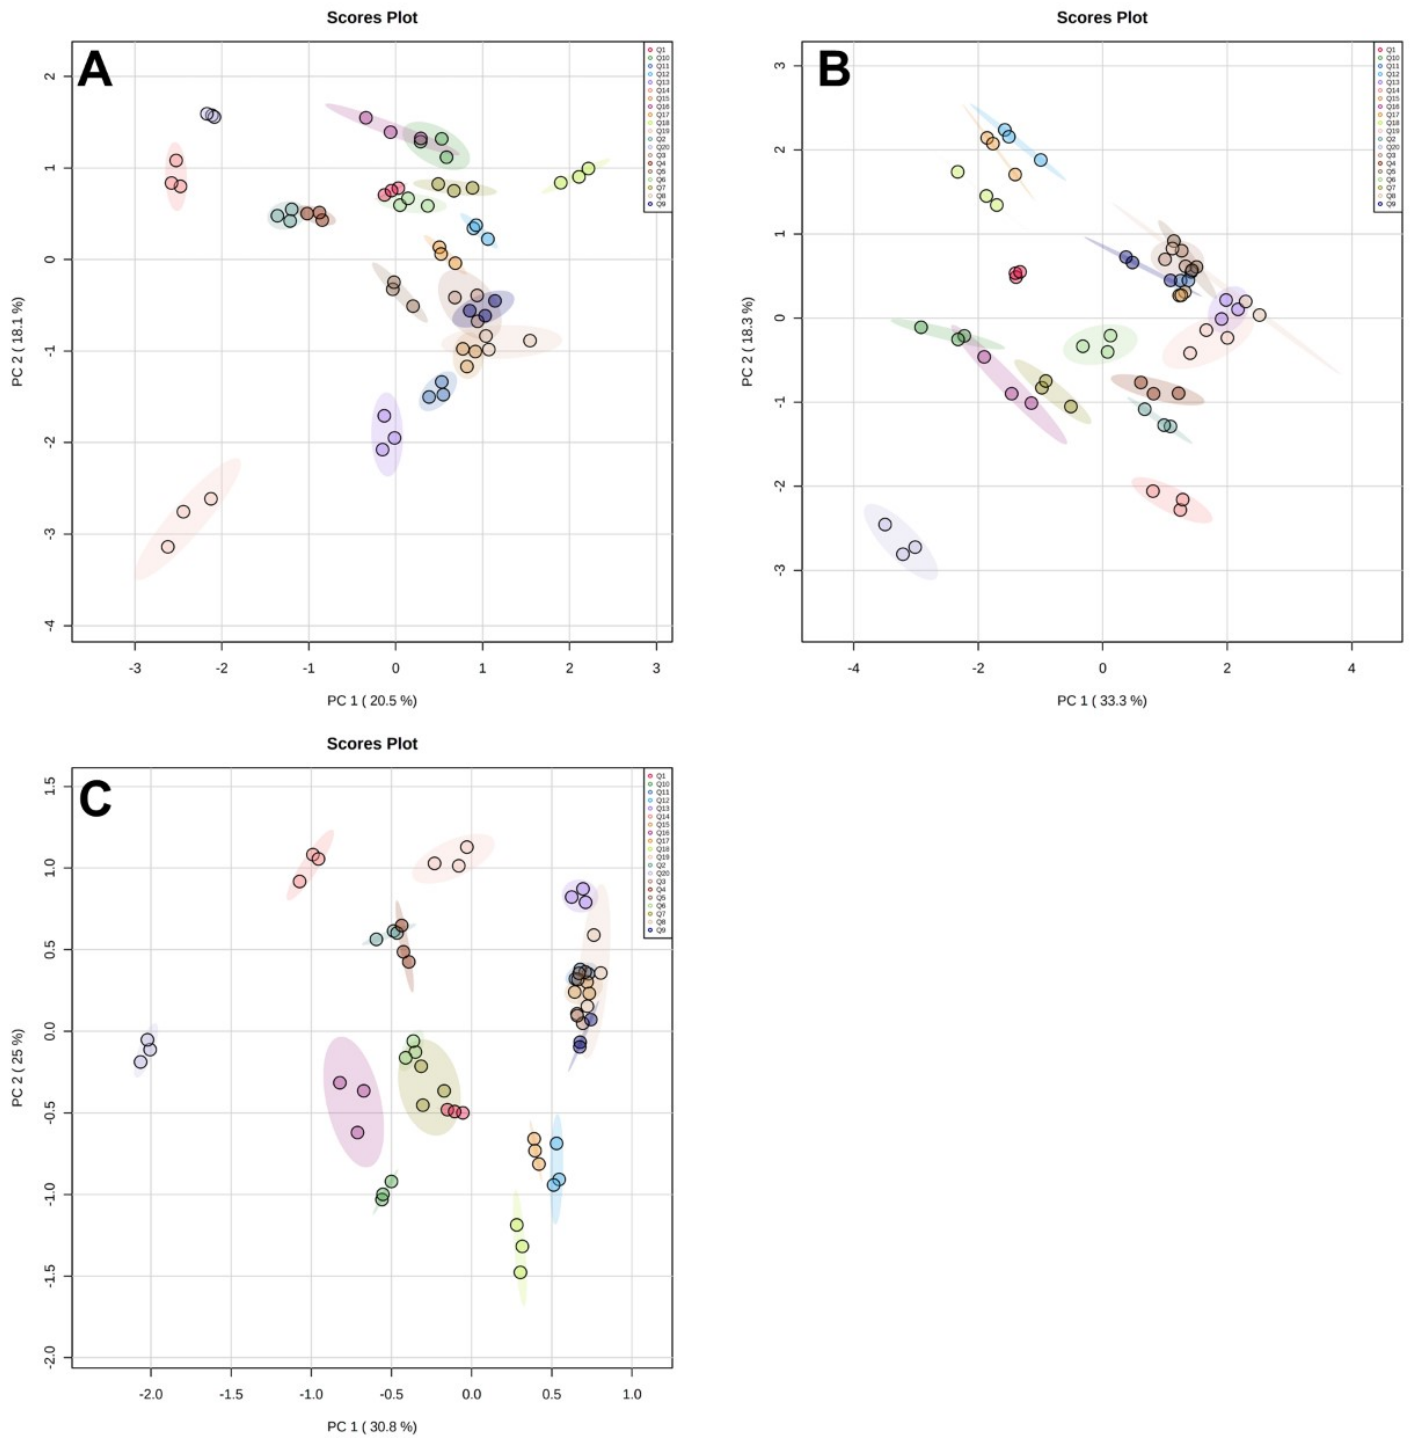

**Fig. S3.** Principal components analysis. Each set of measurements (spectrum) appears as a single point with the coordinates of the scores on the first two principal components (PCs) chosen as axes for the plot within a 95% confidence interval. A, MALDI-TOF MS; B, FT-IR; C, MS-IR. The distribution points of each strain indicate that the typing accuracy greatly increased by combining the data from MALDI-TOF MS and FT-IR.
